# Supplementary material for: Early release of 1-pyrroline by Pseudomonas aeruginosa cultures discovered using ambient corona discharge ionization mass spectrometry
Source: Royal Society of Chemistry journal article supplement (doi:10.1039/c5ra24594j), 2016-01-01
Supplement: c5ra24594j1.pdf [file c5ra24594j1.pdf]

**Early release of 1-pyrroline by *Pseudomonas aeruginosa* cultures discovered using ambient corona discharge ionization mass spectrometry**

Longhua Hu,<sup>1</sup> Juchao Liang,<sup>2</sup> Konstantin Chingin,<sup>2\*</sup> Yaping Hang,<sup>1</sup> Xiaoping Wu,<sup>3</sup> and Huanwen Chen<sup>2\*</sup>

<sup>1</sup>The Second Affiliated Hospital of Nanchang University, Nanchang 330006 China

<sup>2</sup>Jiangxi Key Laboratory for Mass Spectrometry and Instrumentation, East China Institute of Technology, Nanchang 330013 P.R. China

<sup>3</sup>Department of Infections, the First Affiliated Hospital of Nanchang University, Nanchang 330006 P.R. China

## SUPPORTING INFORMATION

Corresponding authors:

Konstantin Chingin (chingin.k@gmail.com); Huanwen Chen (chw8868@gmail.com)

Room 804, Sci. & Tech. Building, 418 Guanglan Road, Nanchang City, Jiangxi Province 330013, P. R. China. Tel: (+86)791-83896370; Fax: (+86)791-83896370.

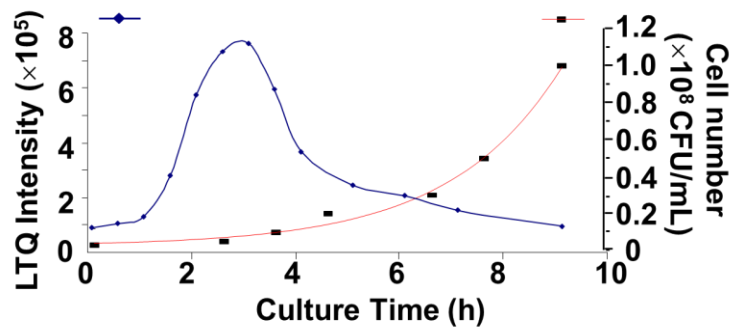

Fig. S-1 The time profiles of 1-pyrroline signal ( $m/z$  70) detected by AMS from the headspace of PA culture (blue) and PA cell count measured by UV spectroscopy (red).

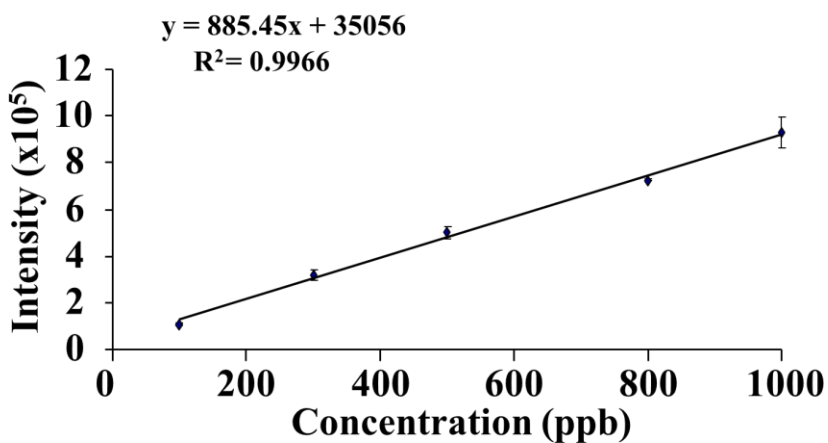

Fig. S-2 The dependence of 1-pyrroline signal intensity ( $m/z$  70) detected by AMS on the concentration of 1-pyrroline in culture medium (tryptic soy broth) solution.

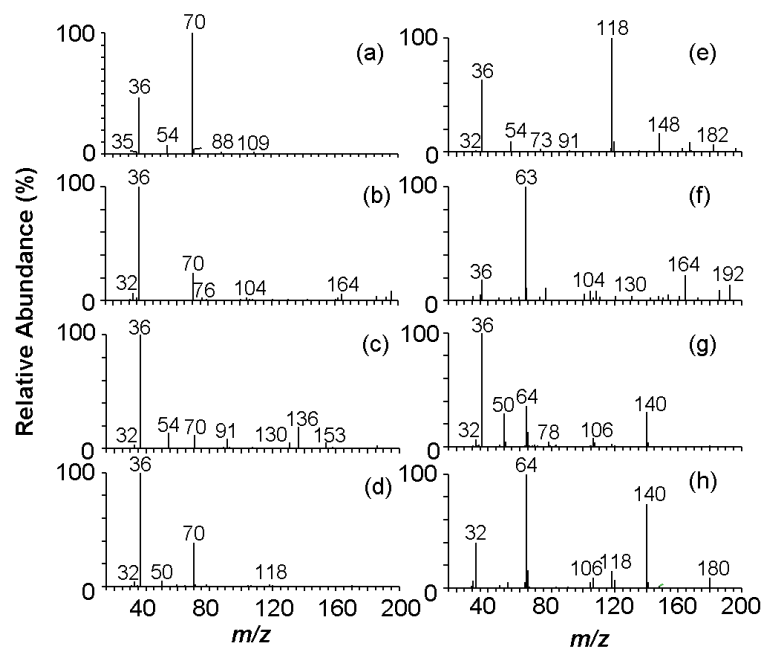

**Fig. S-3** AMS spectrum of volatiles emitted after 12 h incubation by a) PA culture in tryptic soy broth (TSB) medium; b) *P. putida* in TSB medium; c) *B. cepacia* in TSB medium; d) PA in Luria-Bertani broth medium; e) *Escherichia coli* in TSB medium; f) *Klebsiella pneumonia* in TSB medium; g) *Candida albicans* in TSB medium; h) *Candida tropicalis* in TSB medium.
